# Supplementary material for: N-terminal residues of human dyskerin are required for interactions with telomerase RNA that prevent RNA degradation
Source: PubMed Central journal article supplement — Nucleic Acids Res. 2019 Apr 1;47(10):5368–80. doi: 10.1093/nar/gkz233 (PMC6547437; doi:10.1093/nar/gkz233), 2019-04-01
Supplement: gkz233_supplemental_file.pdf [file gkz233_supplemental_file.pdf]

**S1: supplemental data to figure 2**

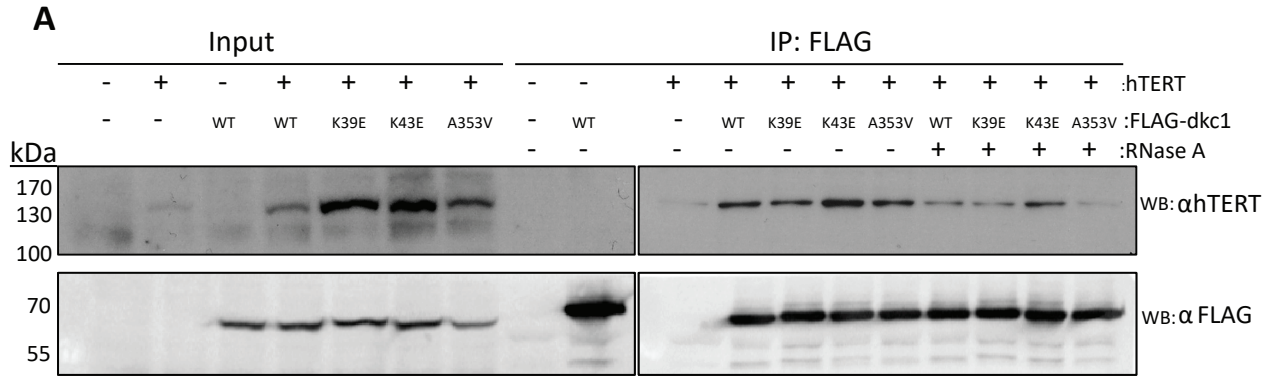

**B**

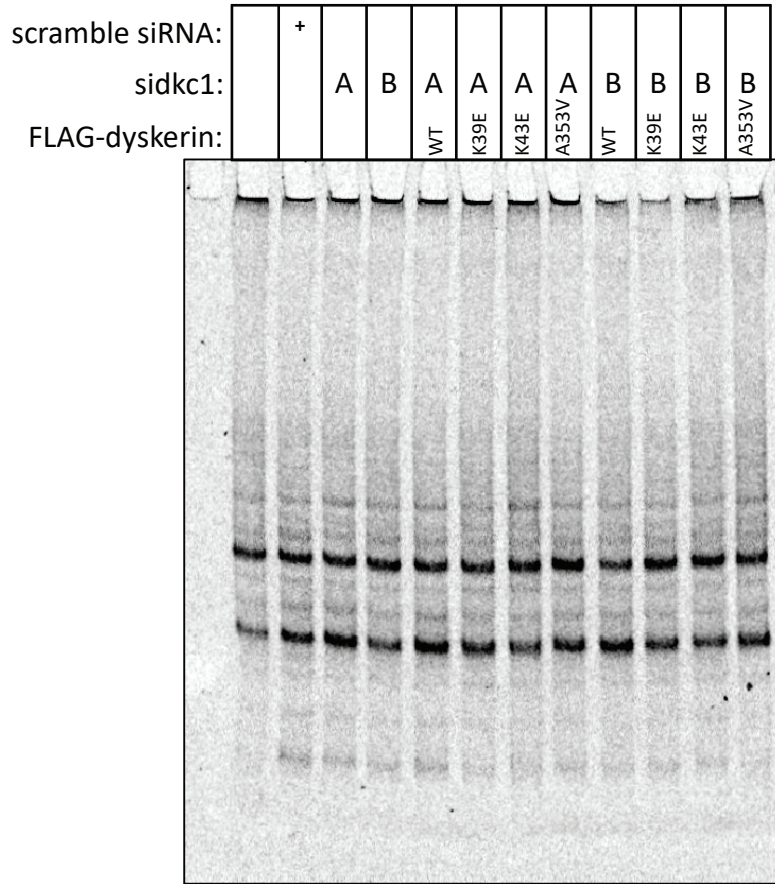

**Figure S1: a.** The interaction between hTERT and dyskerin was also assessed by co-IP in the presence of RNase A to confirm that the observed interaction is dependent on hTR. **b.** A representative image of the telomeric repeat amplification products, assessed on 10% non-denaturing acrylamide gel following Q-TRAP as a quality control check (note that differences in telomerase activity cannot be visualized on this gel, but are quantified based on differences in  $C_T$ ).

## S2 : supplemental data to Figure 3

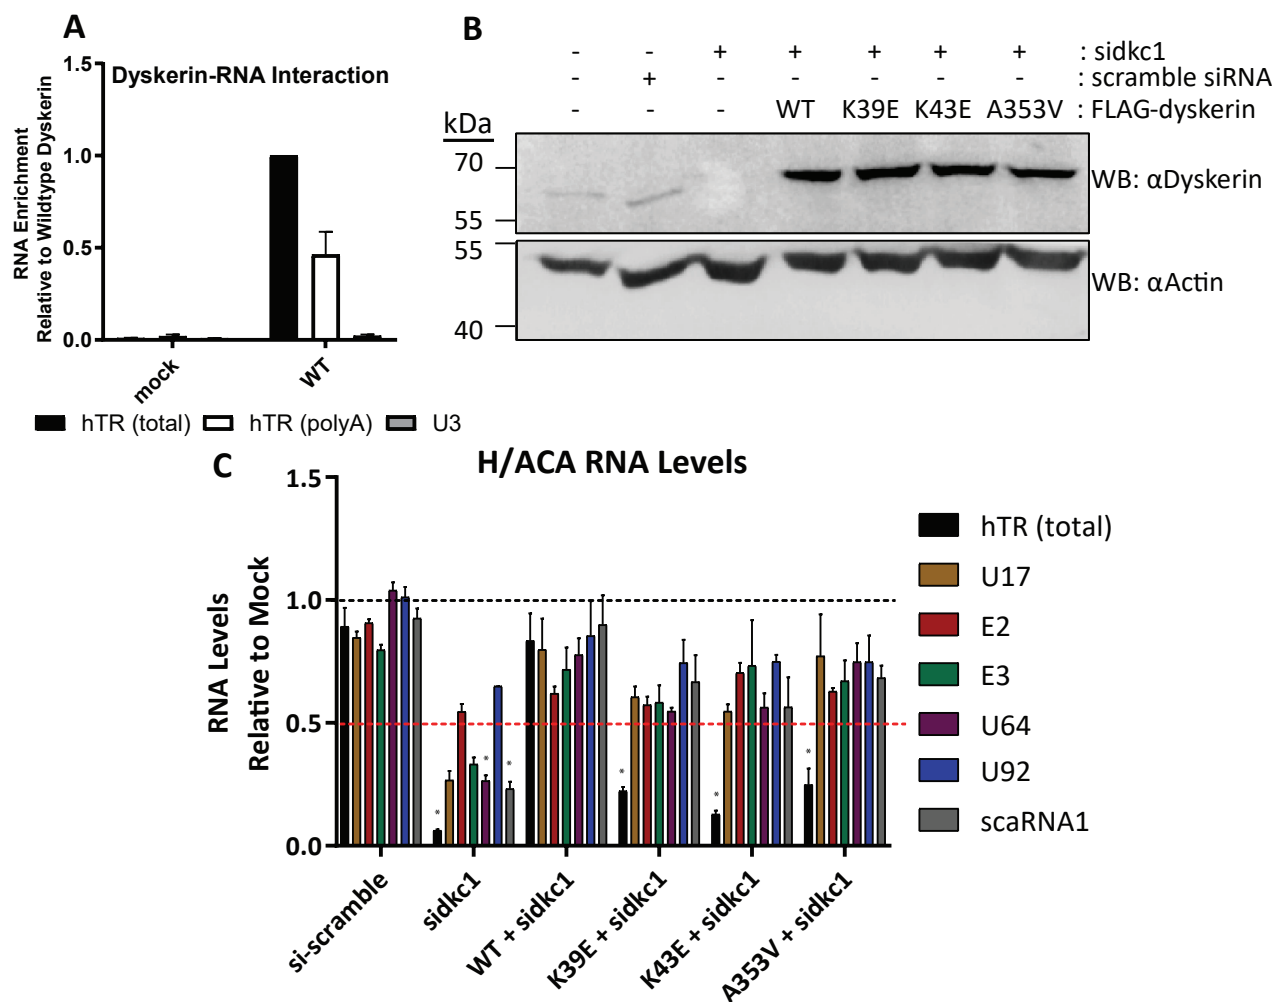

**Figure S2:** **a.** Dyskerin-RNA interactions were assessed by IP of FLAG-tagged dyskerin followed by RNA extraction and qPCR. Relative to wildtype (WT) IP fractions of total hTR, IP fractions from mock transfected cells show no enrichment of hTR. Neither mock nor WT IP fractions showed enrichment of the negative control C/D box RNA U3 relative WT IP of hTR. The interaction of WT dyskerin with polyadenylated hTR species is indicated relative to WT IP of total hTR. These data represent an experimental replicate  $n=3$ . Error bars represent SEM. **b.** Depletion of endogenous dyskerin using sidkc1.A, and expression of FLAG-tagged constructs was assessed by immunoblotting. **c.** RNA levels were assessed as described for **Figure 3C** using HEK293 cells with stable expression of FLAG-tagged wildtype or variants of dyskerin. These data represent experimental replicates of  $n = 3$ . Statistically significant reductions in RNA enrichment compared to WT+sidkc1 treated cells are indicated by \* ( $P$  value  $< 0.01$ ). Error bars represent SEM.

**Table S1 – List of Primers and siRNAs**

| Primer Name    | Primer Sequence                              |
|----------------|----------------------------------------------|
| DKC1 K39E      | F: ACACGCTGAAGAATTTCTTATCGAACCTGAATCCAAAGTT  |
|                | R: AACTTTGGATTCAGGTTTCGATAAGAAATTCTTCAGCGTGT |
| DKC1 K43E      | F: TCTTATCAAACCTGAATCCGAAGTTGCTAAGTTGGACACG  |
|                | R: CGTGTCCAACCTAGCAACTTCGGATTCAGGTTTGATAAGA  |
| DKC1 A353V     | F: GCATTAATGACCACAGTGGTCATCTCTACCTGCG        |
|                | R: CGCAGGTAGAGATGACCACTGTGGTCATTAATGC        |
| DKC1 K446X     | F: GCAAAAACCTGCGTAGCGGAAGCGAGAGAG            |
|                | R: CTCTCTCGCTTCCGCTACGCAGTTTTTGC             |
| Mature hTR     | F: TCTAACCCCTAACTGAGAAGGGCGTAG               |
|                | R: GTTTGCTCTAGAATGAACGGTGAAG                 |
| E1             | F: GCCCATGATGTACAAGTCCC                      |
|                | R: AGGAATATGCAGGCGCAGAC                      |
| E2             | F: AGCTTGGAGTTGAGGCTACTG                     |
|                | R: TAGCGAAAACCTGCCCCTCA                      |
| E3             | F: AGTGCTGTGTTGTCGTTCCC                      |
|                | R: GTATGAGACCAAGCGTCCCT                      |
| U64            | F: GTGTGACTTTTCGTAACGGGGA                    |
|                | R: TTGCACCCCTCAAGGAAAGAG                     |
| U85            | F: TTGGTGGGCGATACAGAGTT                      |
|                | R: CTTGGCCCTGATACCCTGAA                      |
| U87            | F: TTTGTTGCCCTCAACTCCAG                      |
|                | R: GCCACTCGTCAGTCTCCTGT                      |
| U92            | F: GTCACCATGCCTCCCTAGAA                      |
|                | R: ATCTGTCTGCCCCGTATCTG                      |
| SCARNA1        | F: CAGCAGTTGATACTAACCGAGC                    |
|                | R: CCCAGCTATCACAACACATCAC                    |
| U3             | F: TGACGGCTCTTGGGTTTTCT                      |
|                | R: GGGAAACGGCGACAAAAGAG                      |
| GAPDH          | F: CGGAGTCAACGGATTTGGTCGTCGTAT               |
|                | R: TGCTAAGCAGTTGGTGGTGCAGGA                  |
| F1 hTR (-325)  | GGCCCTAAAATCTTCCTGTG                         |
| F2 hTR (+323)  | CGGGTCTCTCGGGGGCGAGGGCGA                     |
| R1 hTR (+610)  | ATTCATTTTGGCCGACTTTG                         |
| 3'UTR sidkc1.A | GGAUAUGGGUGGUGAAAGA dT dT                    |
| 3'UTR sidkc1.B | CCUCAAGCUUGUGUACAG dT dT                     |
| siMTR4         | CAAUUAAGGCUCUGAGUAAUU                        |
| siRRP40        | CACGCACAGUACUAGGUCA dT dT                    |
| siPARN         | AGGCAUUCAUGUUGAGACU dT dT                    |
